# Supplementary figures and images for: Interaction of ions and surfactants at the seawater–air interface
Source: Royal Society of Chemistry journal article supplement (doi:10.1039/d4ea00151f), 2025-01-01

**C 1s**

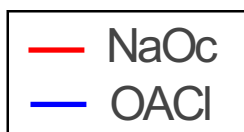

$\text{CH}_x$

$-\text{COO}^-$   $-\text{CNH}_3^+$

(f)

(e)

(d)

(c)

(b)

(a)

Intensity (arb. units)

200

202

204

206

208

Kinetic energy (eV)

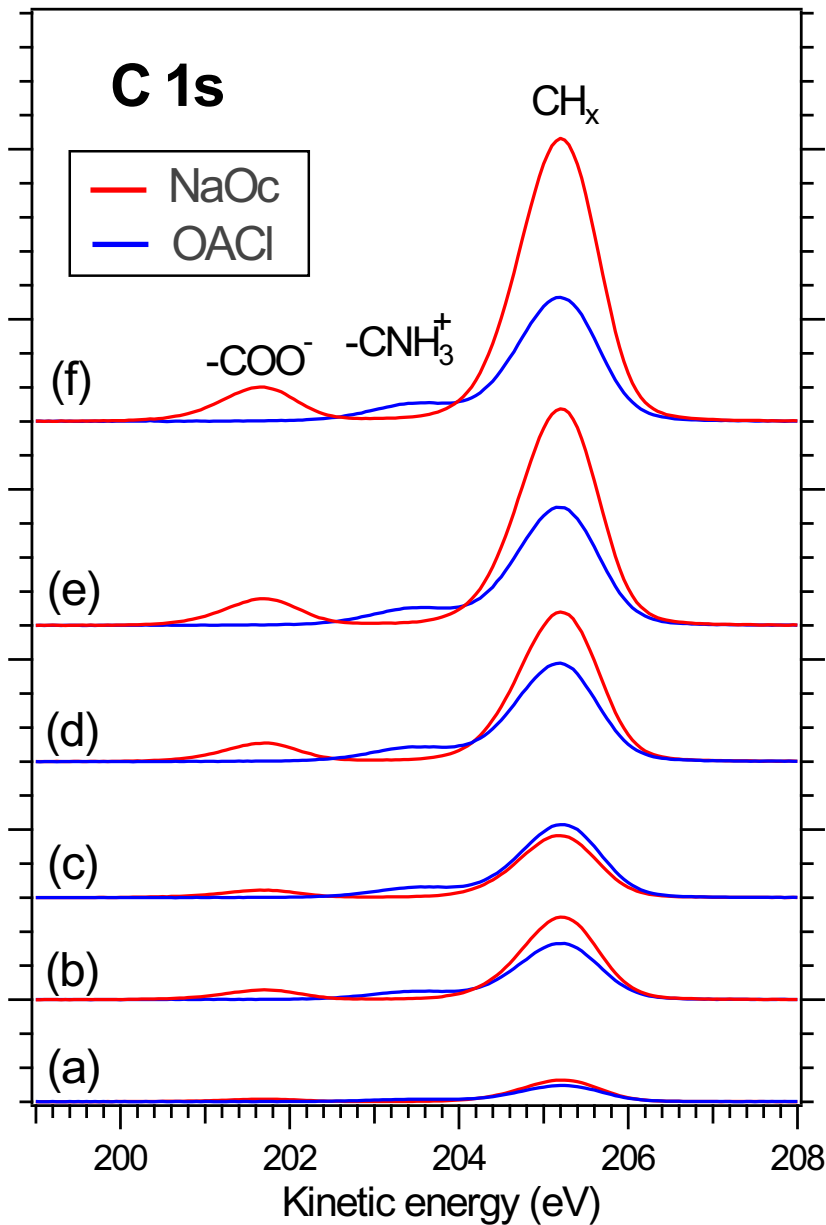

Supplement: d4ea00151f1.zip [file d4ea00151f1.zip]

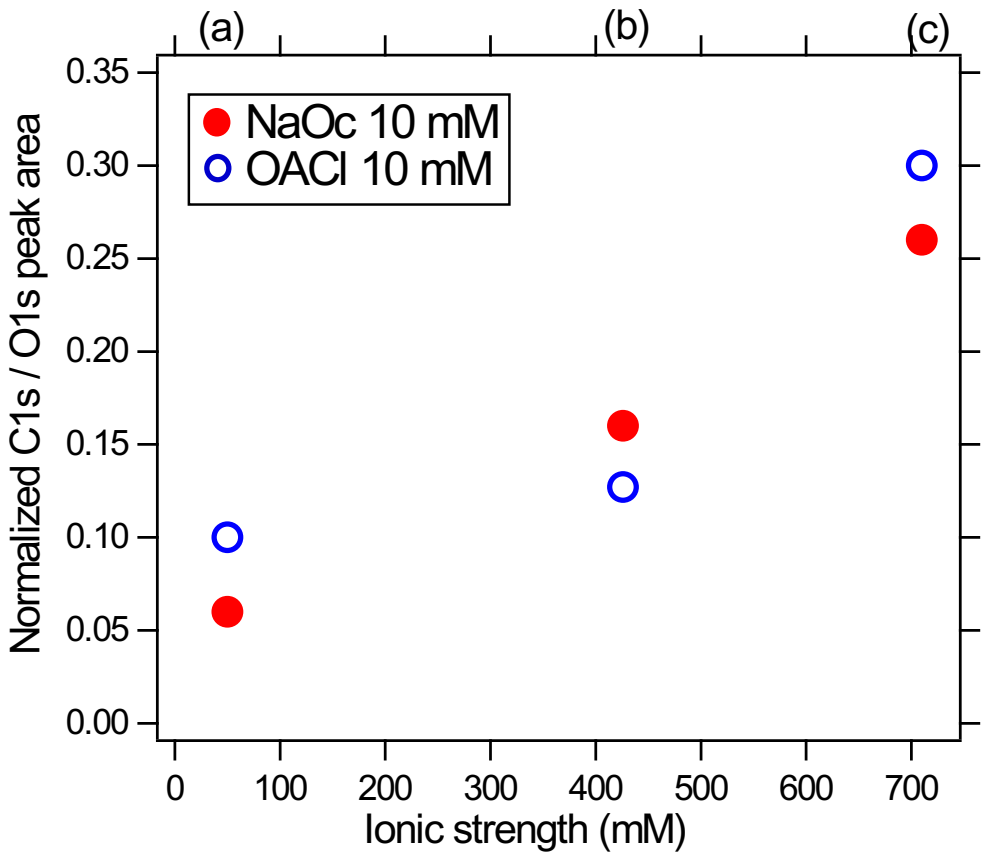

Supplement: d4ea00151f1.zip [file d4ea00151f1.zip]

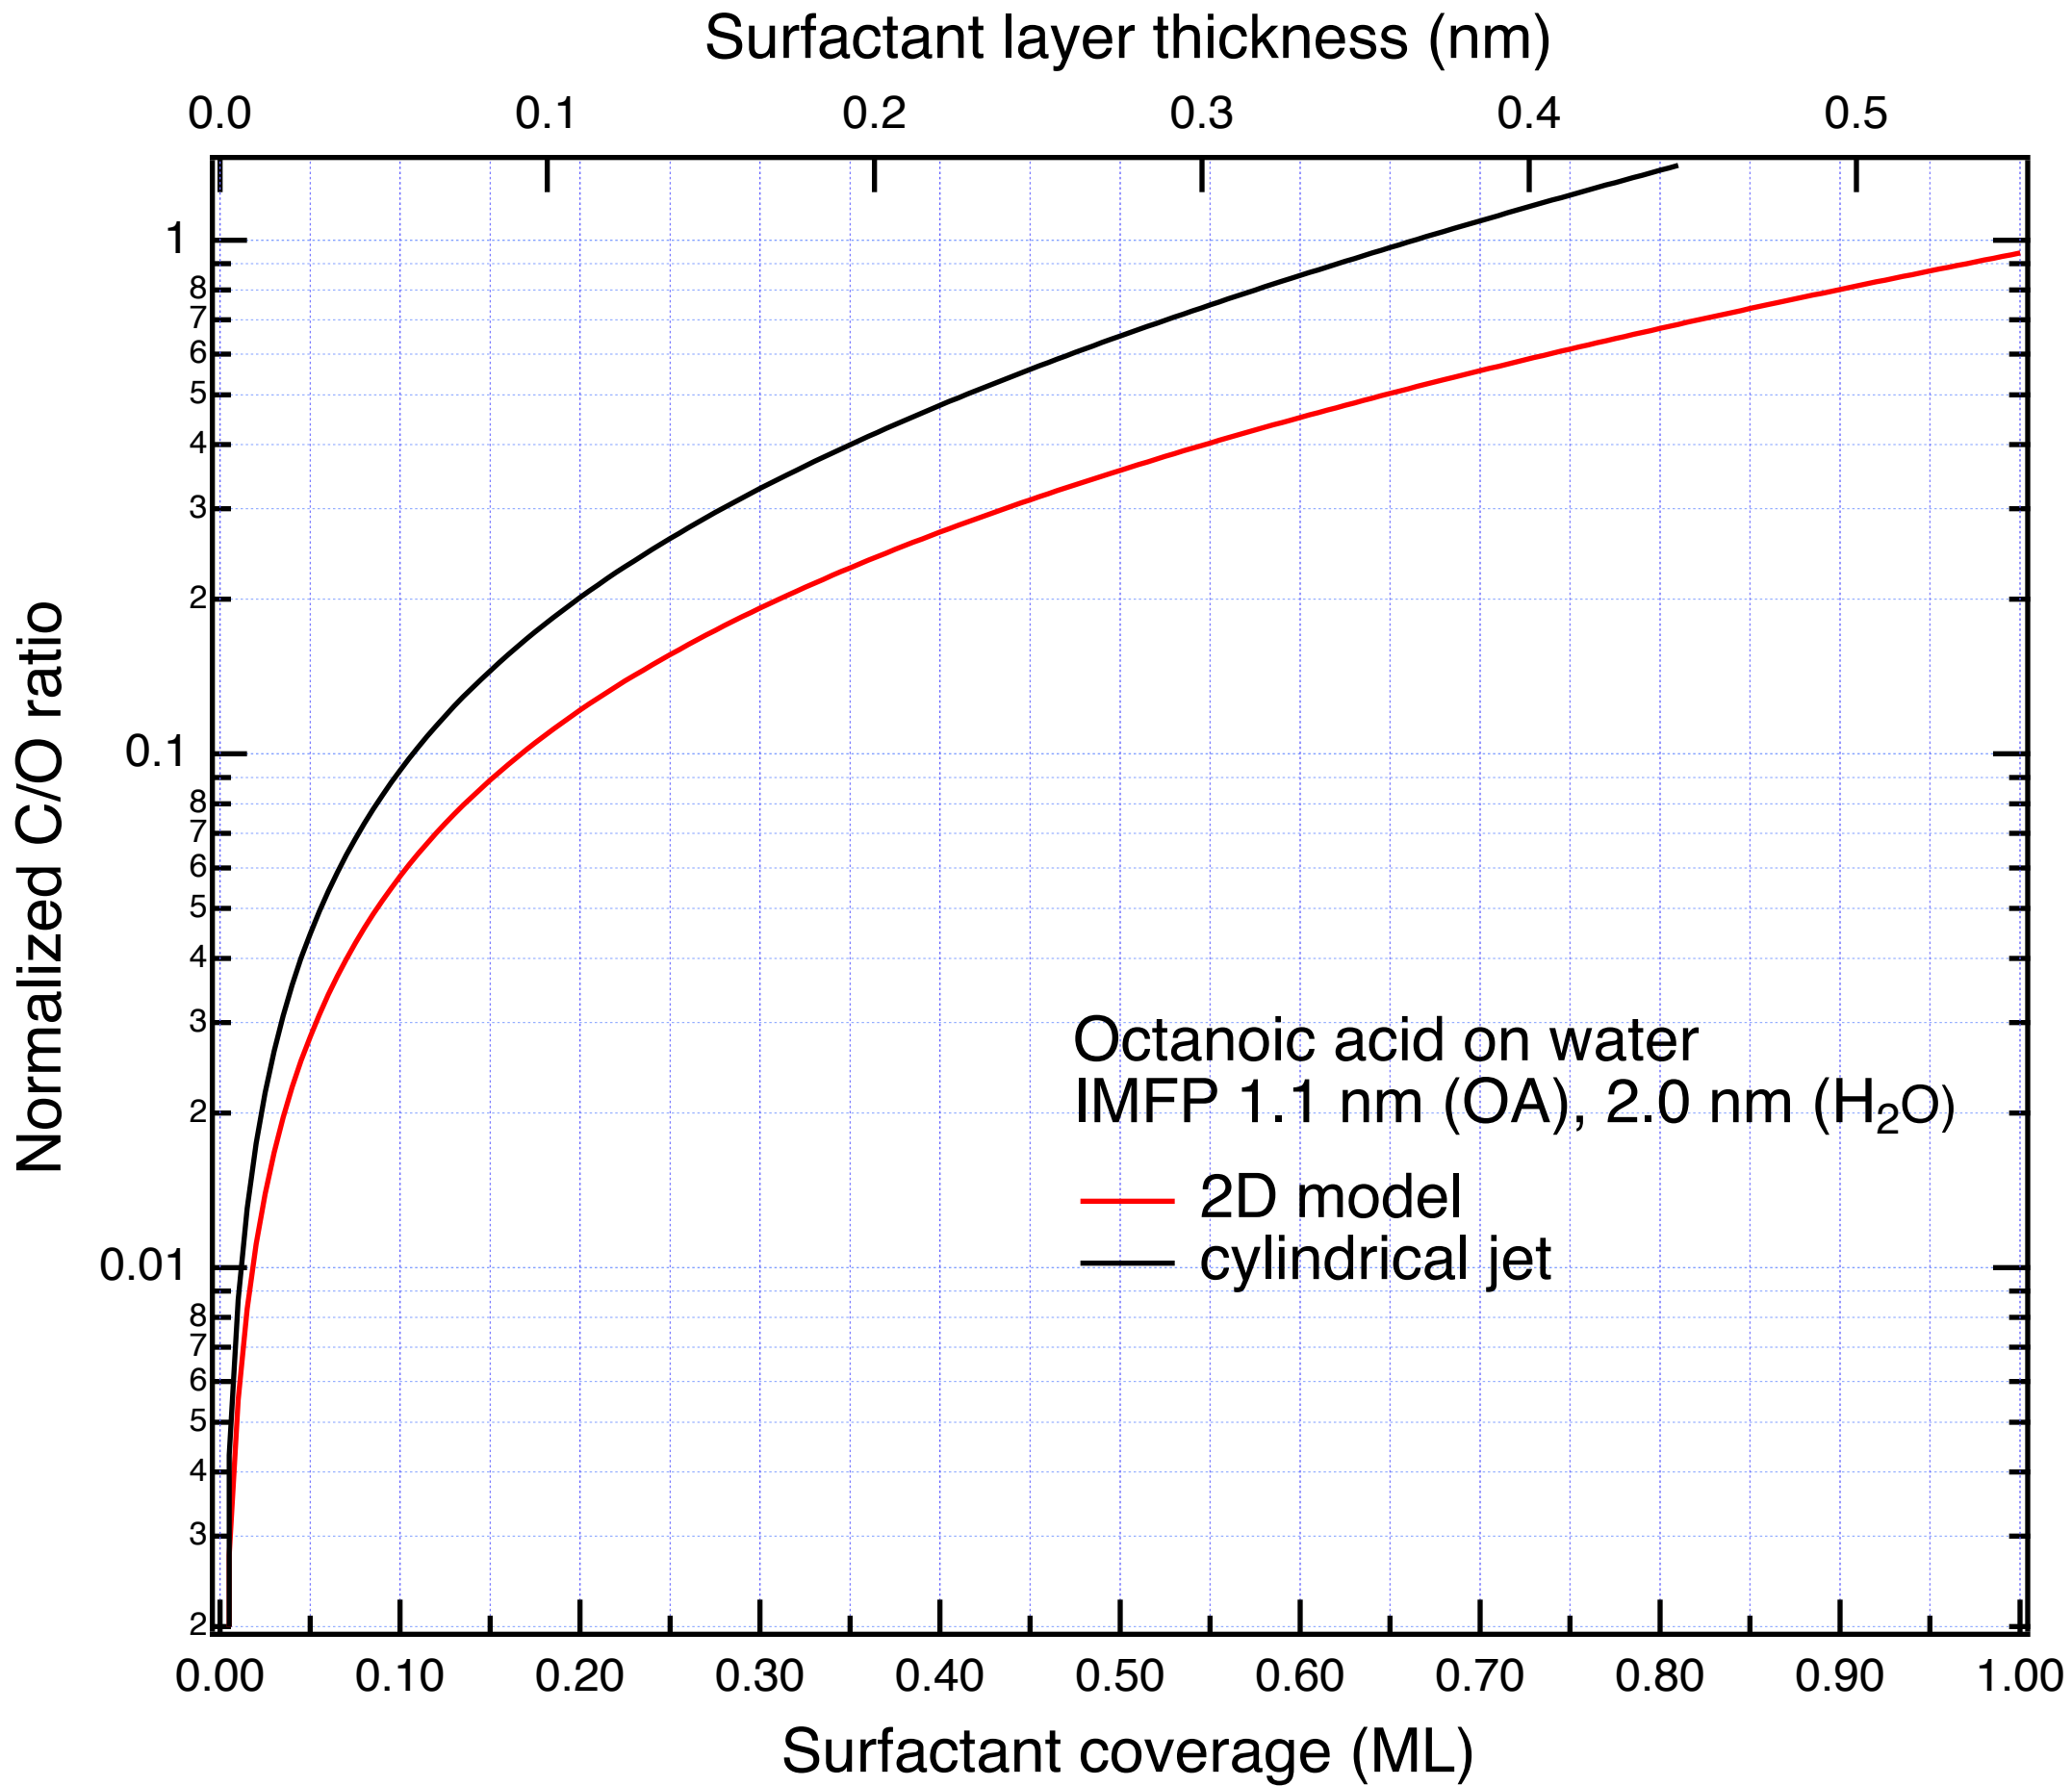

Supplement: d4ea00151f1.zip [file d4ea00151f1.zip]

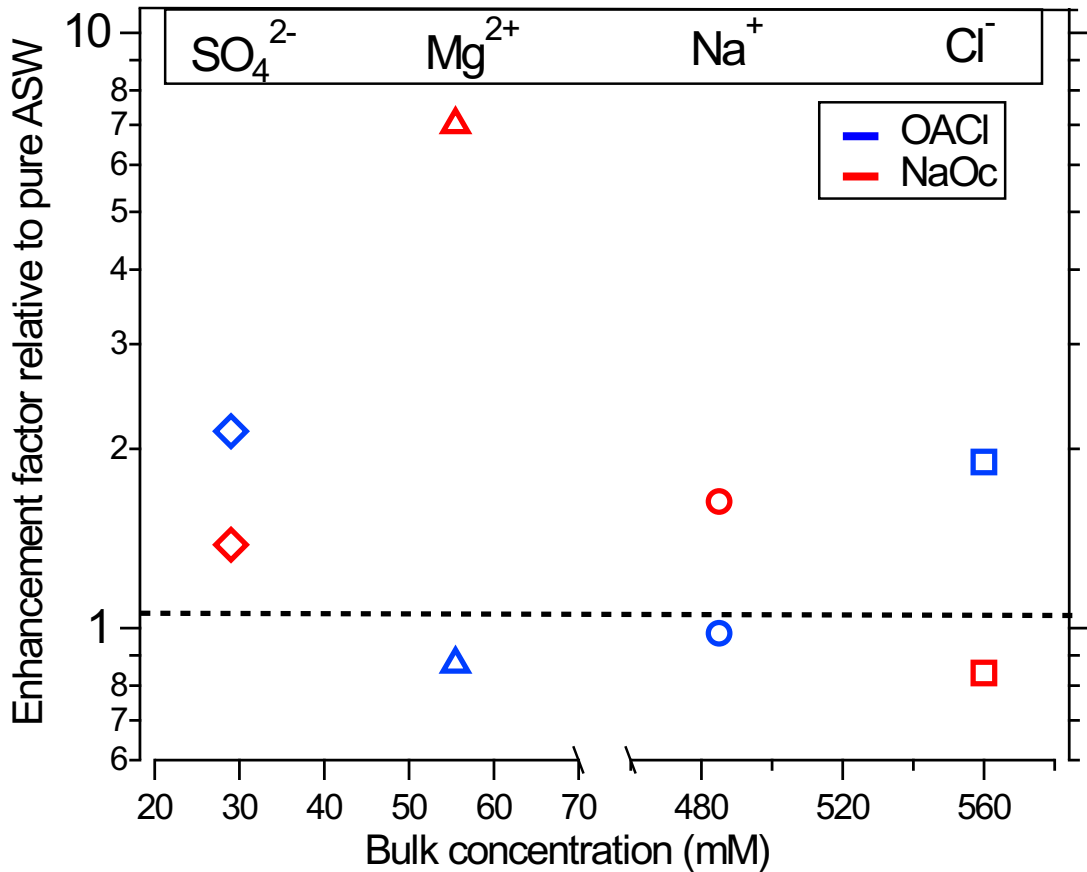

Supplement: d4ea00151f1.zip [file d4ea00151f1.zip]

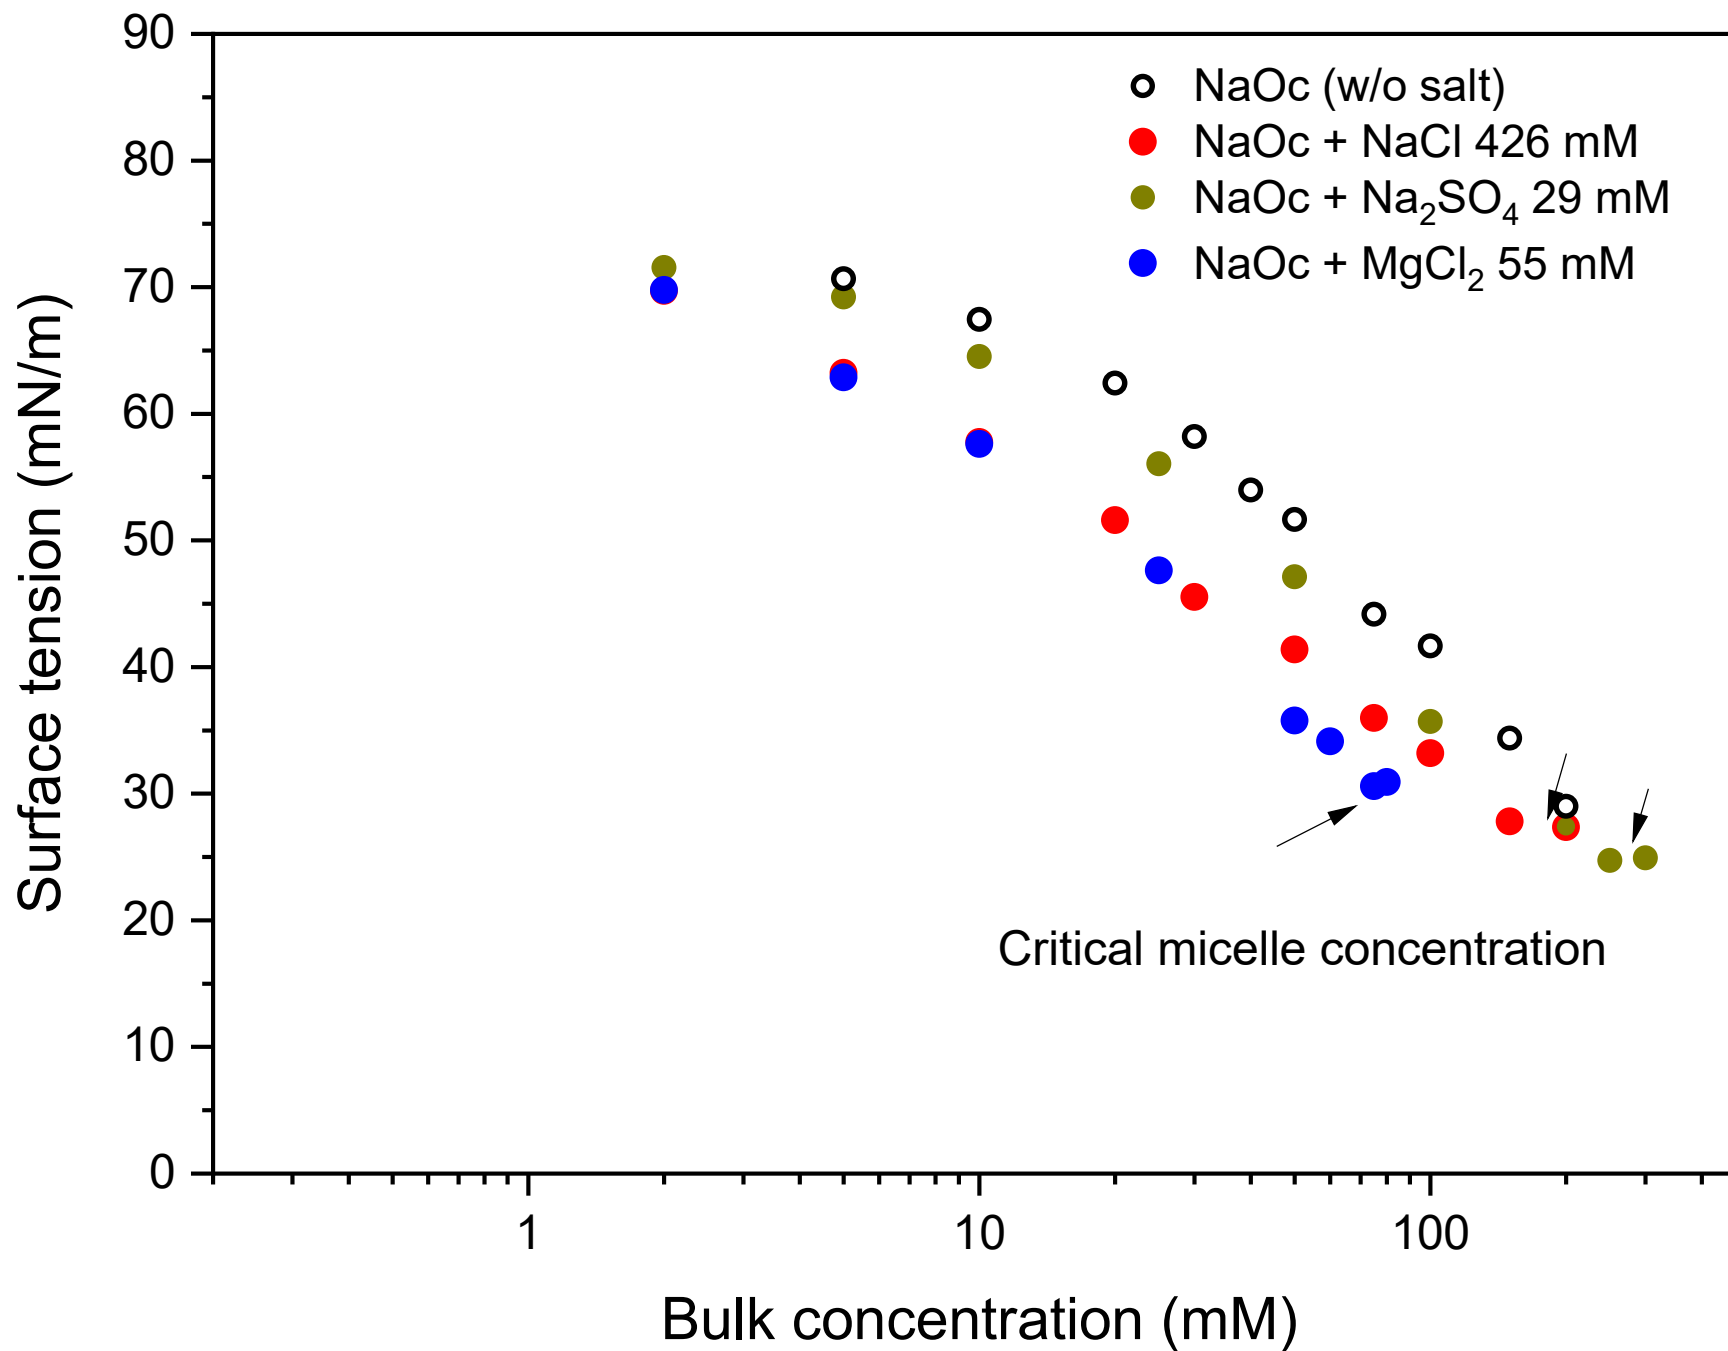

Supplement: d4ea00151f1.zip [file d4ea00151f1.zip]

Enhancement of ions relative to pure case

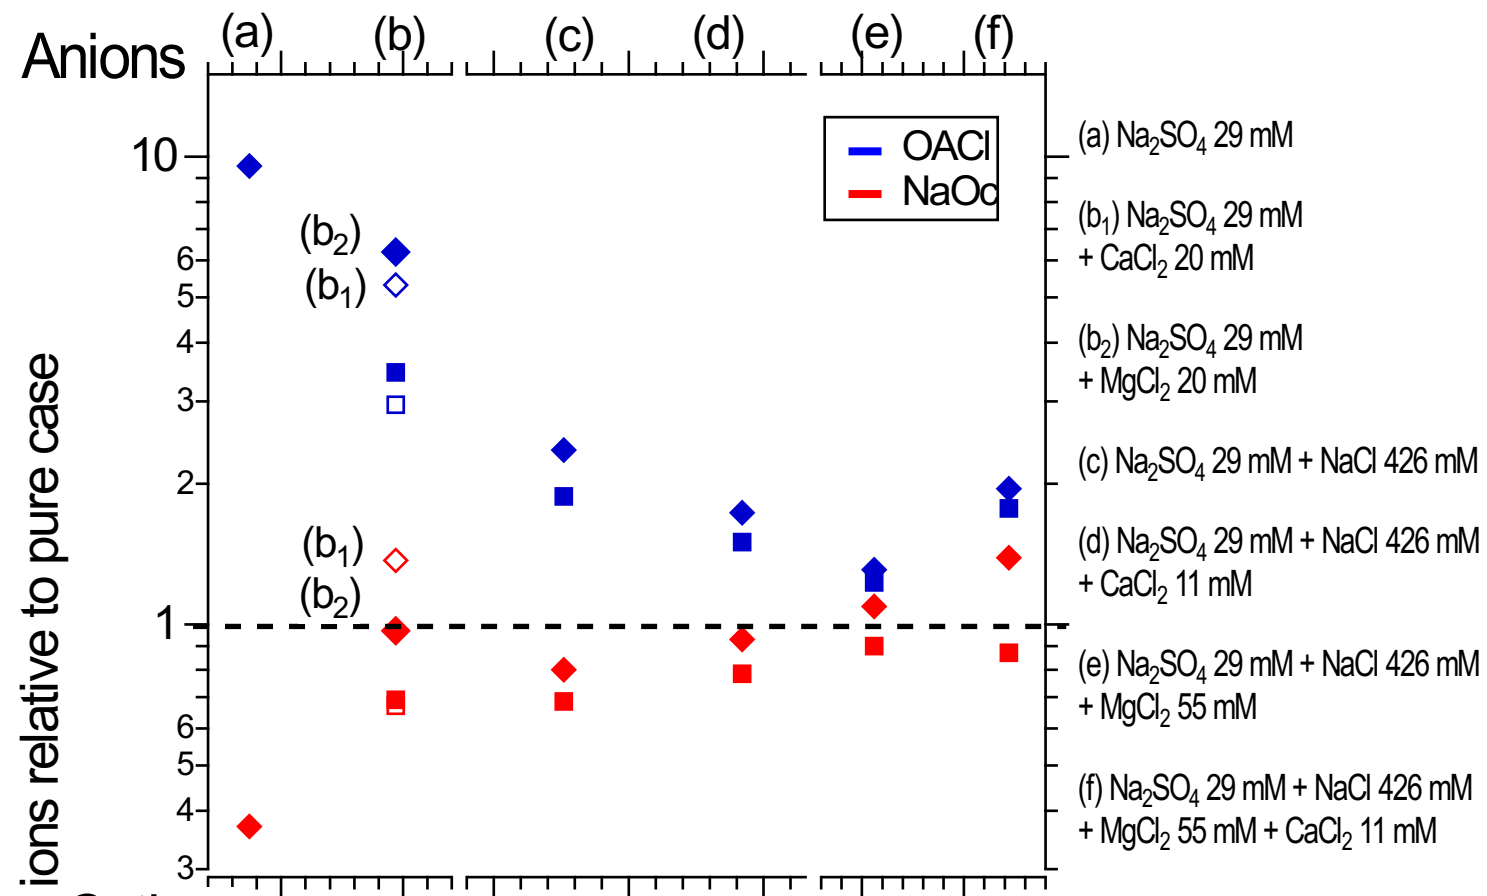

**Cations**

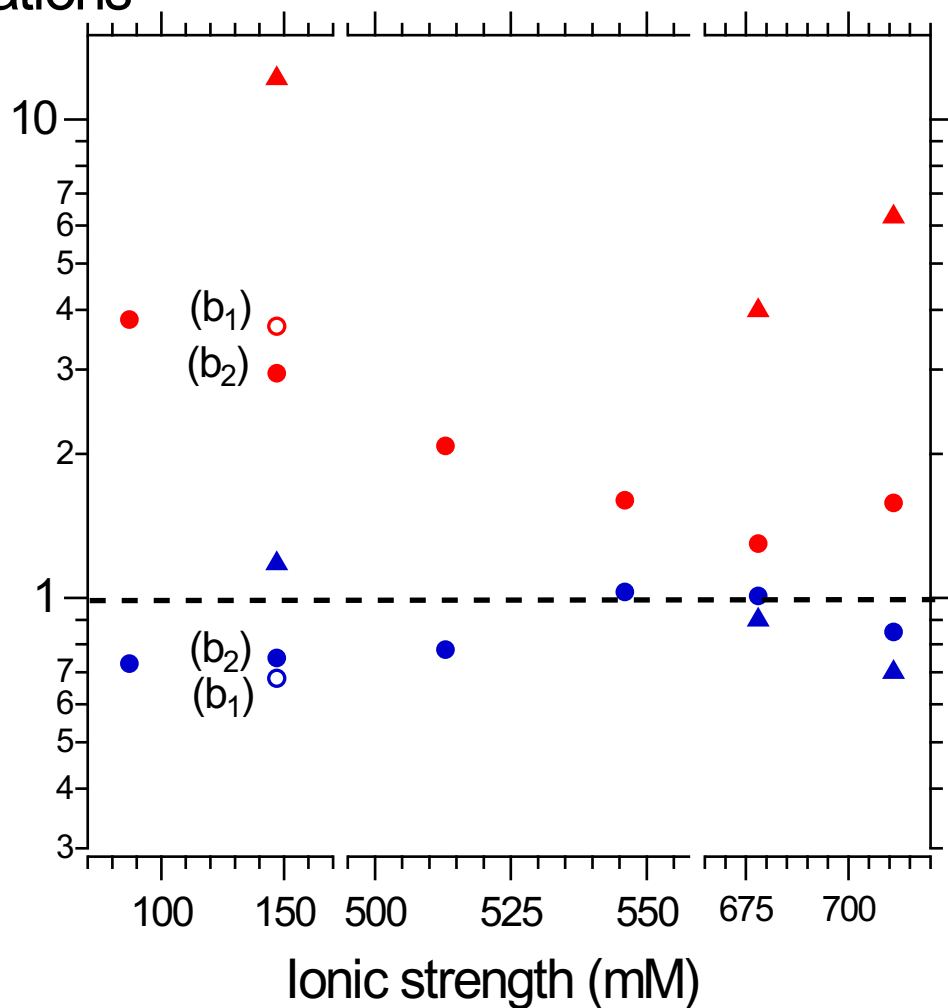

Supplement: d4ea00151f1.zip [file d4ea00151f1.zip]

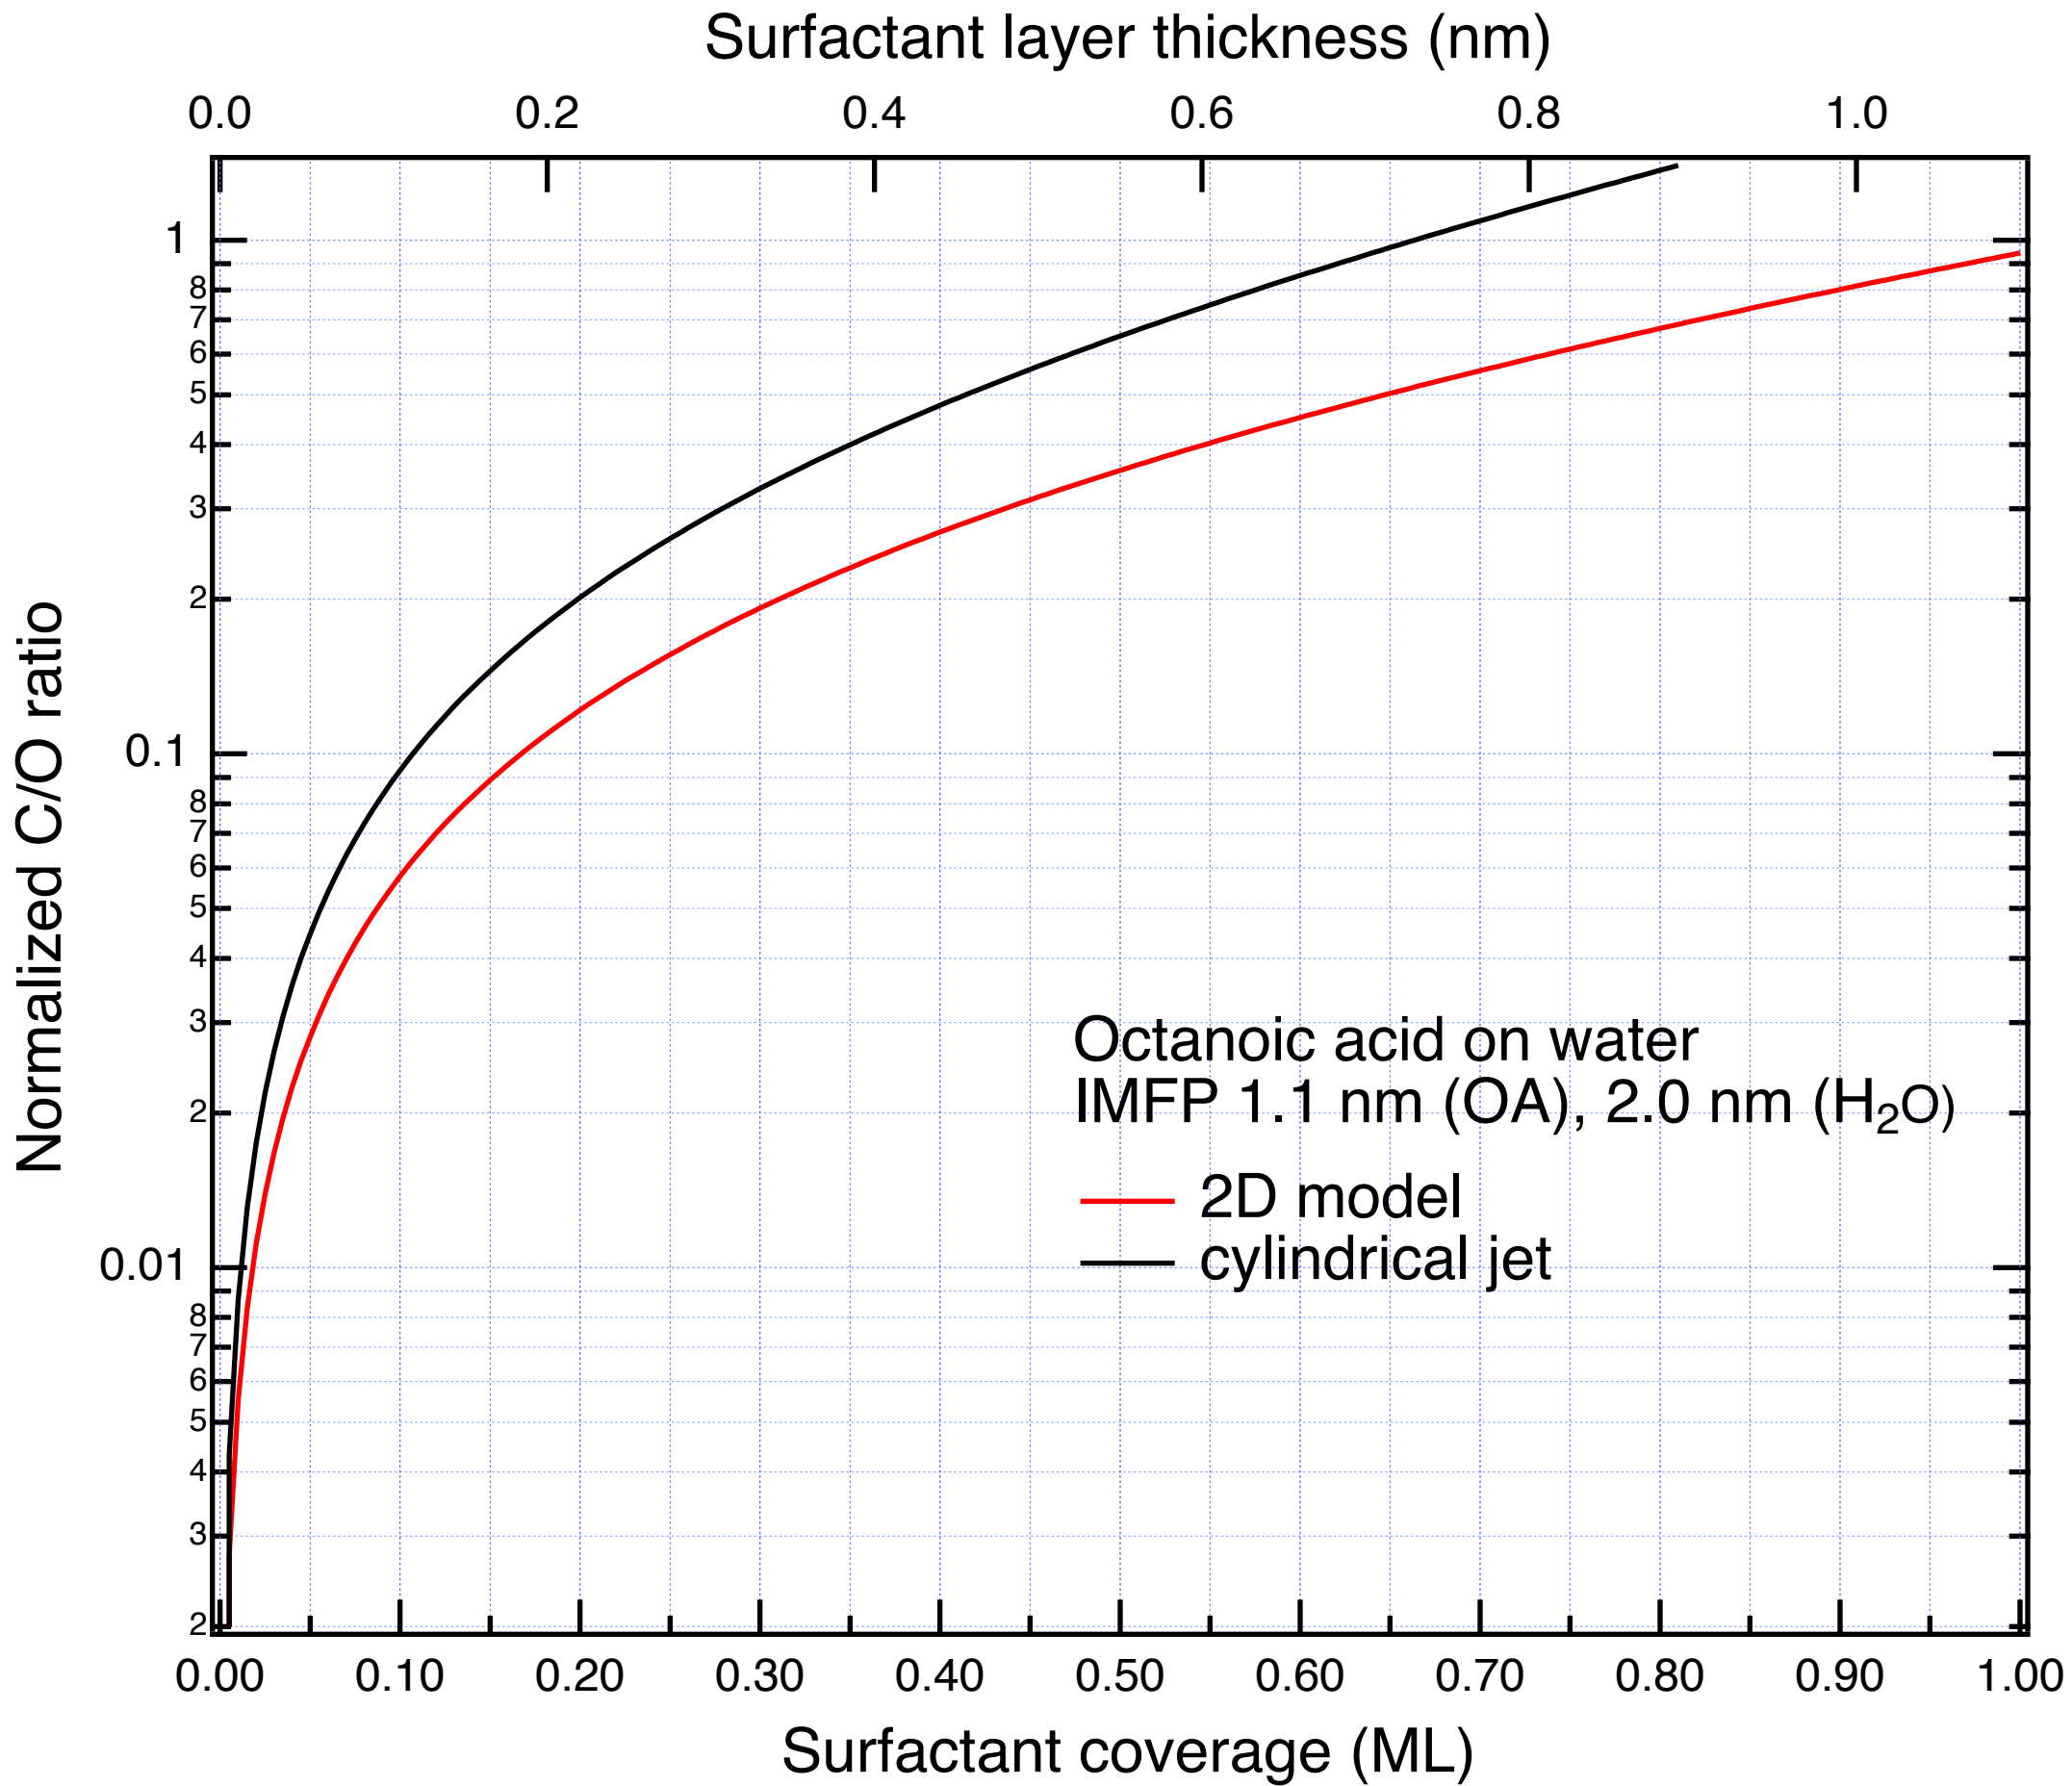

Supplement: d4ea00151f1.zip [file d4ea00151f1.zip]

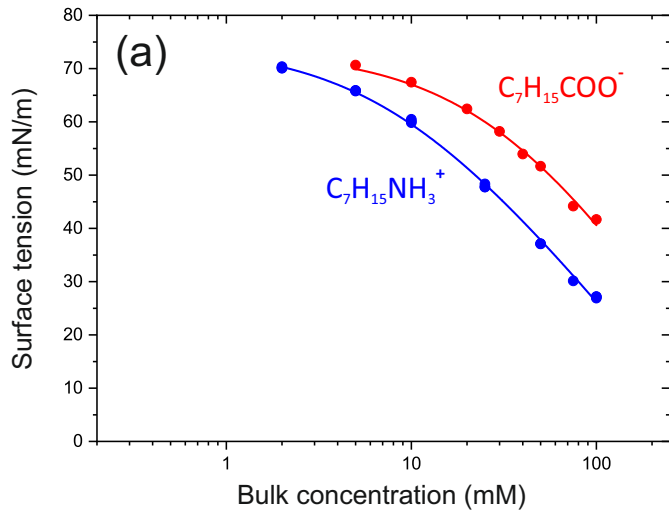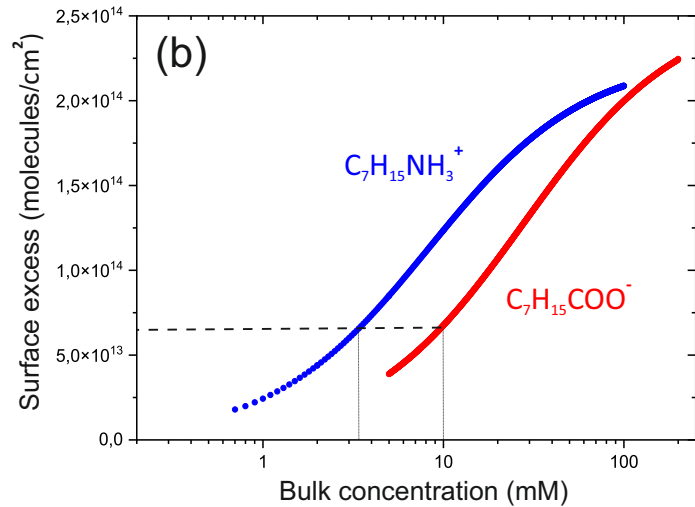

Supplement: d4ea00151f1.zip [file d4ea00151f1.zip]

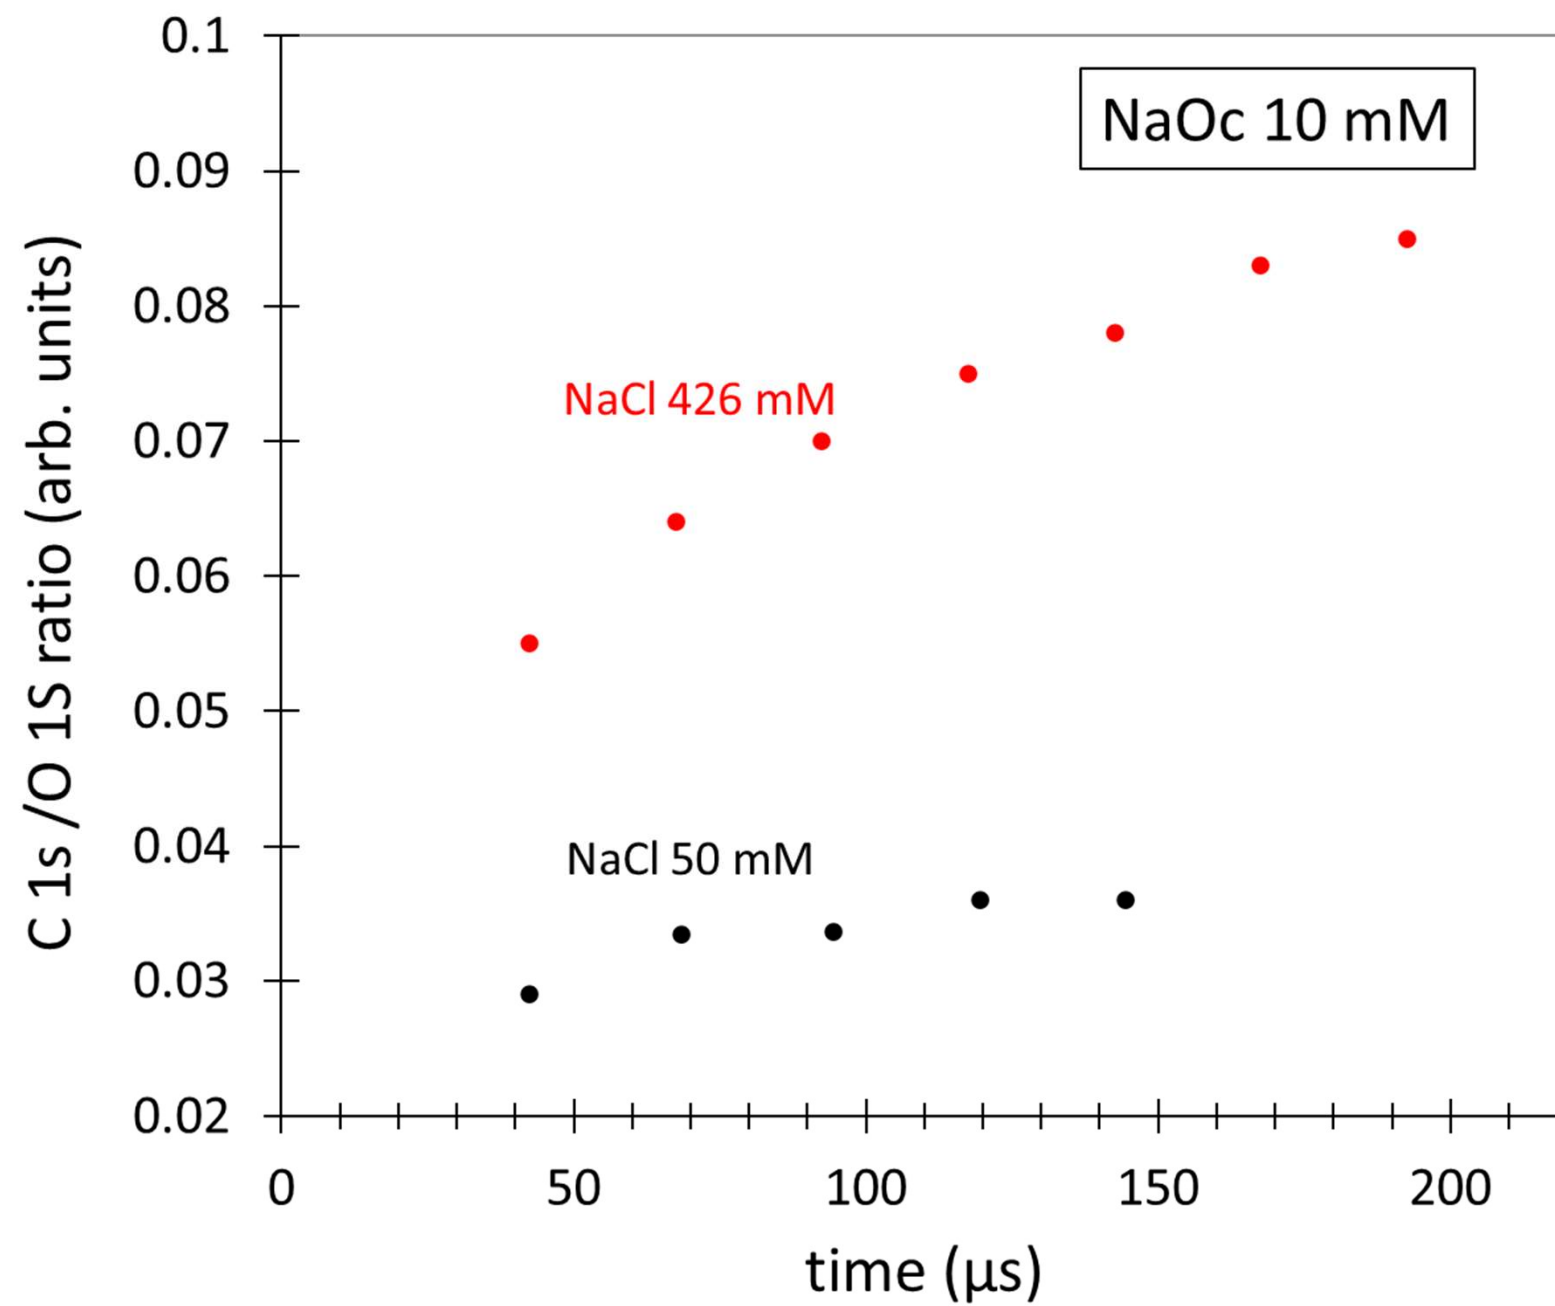

Supplement: d4ea00151f1.zip [file d4ea00151f1.zip]

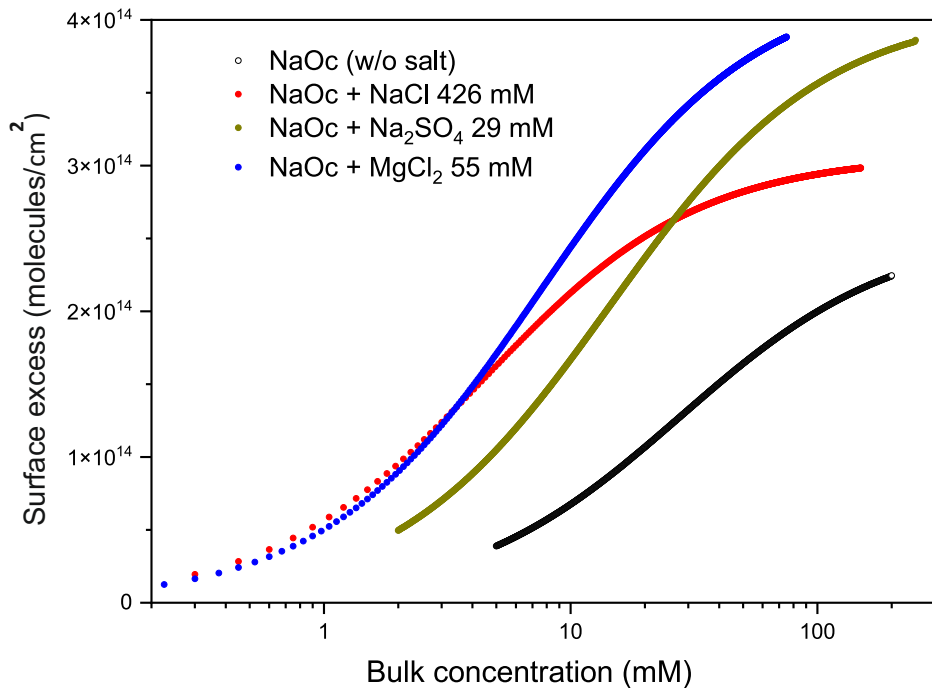

Supplement: d4ea00151f1.zip [file d4ea00151f1.zip]
